# Supplementary material for: A library-screening approach for developing a fluorescence sensing array for the detection of metal ions
Source: Royal Society of Chemistry journal article supplement (doi:10.1039/c6an00510a), 2016-01-01
Supplement: c6an00510a1.pdf [file c6an00510a1.pdf]

Supplementary Information for

## **A library-screening approach to developing a fluorescent sensing array for the detection of metal ions**

David G. Smith,<sup>[a]</sup> Naveed Sajid,<sup>[a,b]</sup> Simone Rehn,<sup>[a]</sup> Ramya Chandramohan,<sup>[a]</sup> Isaac J. Carney,<sup>[a]</sup> Misbahul A. Khan,<sup>[b]</sup> and Elizabeth J. New\*<sup>[a]</sup>

## General methods and materials

All solvents used were laboratory grade and were dried over appropriate drying agents when required. MilliQ water was used to prepare all aqueous solutions. Merck 230-400 mesh Kieselgel 60 0.25 mm F254 precoated sheets were used for analytical thin layer chromatography. Chemicals were obtained from Sigma-Aldrich, Alfa Aesar and Combi-Blocks and used as received. Greiner black polypropylene 96-well plates were used for plate reader measurements. Fluorescence measurements were collected using a bench top Perkin Elmer Enspire Multimode Plate Reader.

## Synthetic Procedures

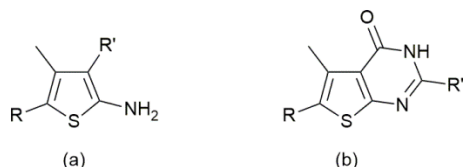

### General procedure for class (a):

A mixture of a ketone (0.1 mol), active methylene (0.1 mol) and elemental sulfur (0.1 mol) in ethanol (10 ml) was treated with morpholine (2 mL). The reaction mixture was refluxed for 2 hr and subsequently cooled to room temperature. Crystals were obtained which were filtered, washed with ethanol, and dried.

### General procedure for class (b):

A mixture of a 2-amino-thiophene-3-carboxamide (0.05 mol) and the appropriate aldehyde (0.05 mol) were dissolved in methanol, 5 drops of concentrated HCl were added and the solution stirred for 4 hr. The precipitate obtained was filtered, washed with ethanol, and dried.

### TAP-6

$^1\text{H}$  NMR (300 MHz, DMSO):  $\delta$  7.99 (s, 1H), 2.91-2.82 (m, 2H), 2.78-2.67 (m, 2H), 1.85-1.69 (m, 4H).  $^{13}\text{C}$  NMR (75 MHz, DMSO):  $\delta$  162.4, 157.7, 144.8, 132.1, 130.8, 122.7, 25.3, 24.4, 22.5, 21.8; MS (ESI)  $[\text{M-H}]^-$  205.1.

### TAP-14

$^1\text{H}$  NMR (300 MHz, DMSO):  $\delta$  8.20 (s, 1H), 4.30 (q,  $J = 7.1$ , 2H), 2.81 (s, 3H), 1.30 (t,  $J = 7.1$ , 3H).  $^{13}\text{C}$  NMR (75 MHz, DMSO):  $\delta$  165.8, 161.9, 158.6, 148.6, 143.4, 123.8, 121.3, 14.9, 14.1; MS (ESI)  $[\text{M+H}]^+$  239.2.

### TAP-27

$^1\text{H}$  NMR (300 MHz, DMSO):  $\delta$  7.94 (d,  $J = 16.1$ , 1H), 7.70-7.62 (m, 2H) 7.56-7.36 (m, 7H), 7.02 (d,  $J = 16.1$ , 1H), 4.40 (s, br, 1H), 2.57 (s, 3H);  $^{13}\text{C}$  NMR (75 MHz, DMSO):  $\delta$  161.0, 154.2, 152.0, 134.9, 132.7, 132.4, 129.2, 129.1, 129.0, 127.9, 127.7, 125.8, 14.9; MS (ESI)  $[\text{M-H}]^-$  343.2.

### TAP-36

$^1\text{H}$  NMR (300 MHz, DMSO):  $\delta$  8.71 (ddd,  $J = 4.8, 1.5, 0.9$ , 1H), 8.42 (s, 1H), 8.07 (d,  $J = 7.6$ , 1H), 7.96 (td,  $J = 7.6, 1.5$ , 1H), 7.52 (ddd,  $J = 7.6, 4.8, 1.5$ , 1H), 7.48 (br s, 2H), 2.76-2.66 (m, 4H), 1.83-1.66 (m, 4H);  $^{13}\text{C}$  NMR (75 MHz, DMSO):  $\delta$  164.9, 156.2, 153.2, 150.2, 148.4, 137.2, 135.7, 133.0, 132.3, 125.7, 122.3, 25.4, 25.0, 22.6, 22.0; MS (ESI)  $[\text{M+Na}]^+$  308.1.

## Array Measurements

The initial screening was performed using a final probe concentration of 100  $\mu\text{M}$  and final metal concentration of 1 mM. The more detailed investigation of the top twelve performing probes was performed using a probe concentration of 10  $\mu\text{M}$  and metal concentration of 100  $\mu\text{M}$ . The final lake-water experiment was performed using a probe concentration of 100  $\mu\text{M}$  and metal concentration of 1 mM. Metal salts used were  $\text{AlCl}_3$ ,  $\text{Cd}(\text{NO}_3)_2$ ,  $[(\text{CH}_3\text{CN})_4\text{Cu}]\text{PF}_6$ ,  $\text{Cu}(\text{NO}_3)_2$ ,  $\text{K}_2\text{Cr}_2\text{O}_7$ ,  $(\text{NH}_4)_2\text{Fe}(\text{SO}_4)_2$ ,  $\text{Hg}(\text{NO}_3)_2$ ,  $\text{Ni}(\text{NO}_2)_2$ ,  $\text{Zn}(\text{NO}_2)_2$  and 10 mM stock solutions were prepared in water (acetonitrile for the copper(I) salt). Stock solutions of the probes were made in DMSO, at a concentration of 2, 5 or 10 mM depending upon their solubility. Lake water was obtained from Lake Northam in Victoria Park, Sydney.

During the initial screening of the fifty-five probes against all metals, matrix scans or contour plots were obtained. Multiple spectra were taken for each condition, exciting in steps of every 10 nm from 230 – 460 nm and collecting emission every 10 nm up to 700 nm. The starting emission wavelength was 20 nm higher than the excitation wavelength used – the minimum separation allowed by the instrument.

For the second screening of the selected top twelve probes, and final lake-water array of the four selected probes, individual excitation/emission points were taken. These were chosen based on the point where maximum change was observed for each probe during round one.

Principal Component Analysis and Linear Discriminant Analysis were performed using SPSS.

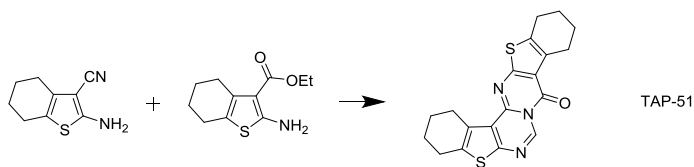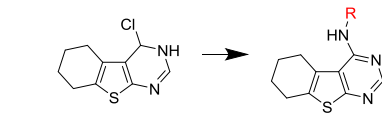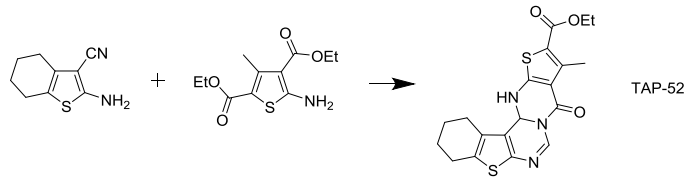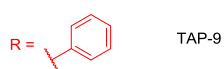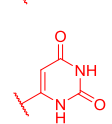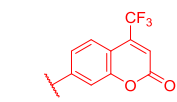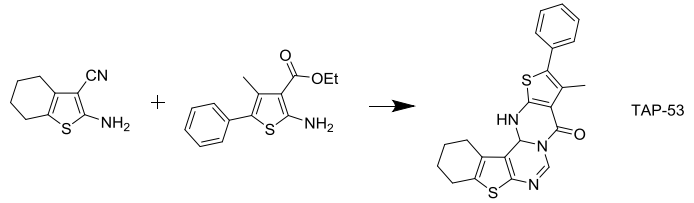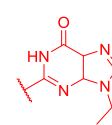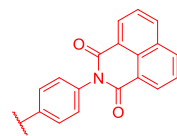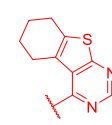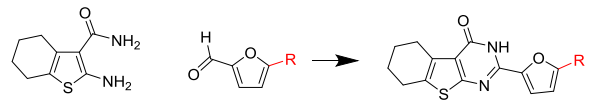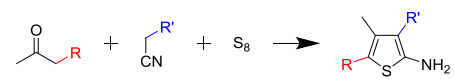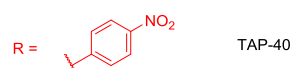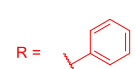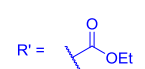

TAP-10

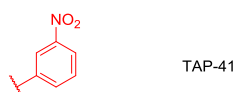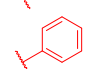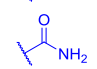

TAP-11

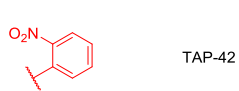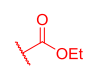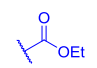

TAP-16

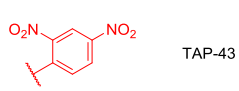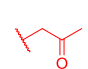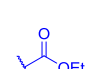

TAP-18

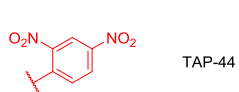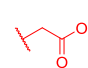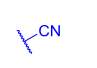

TAP-20

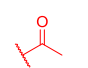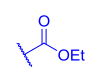

TAP-21

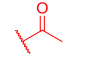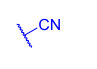

TAP-22

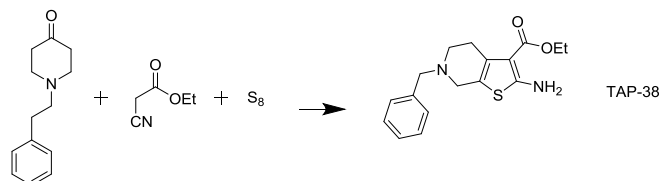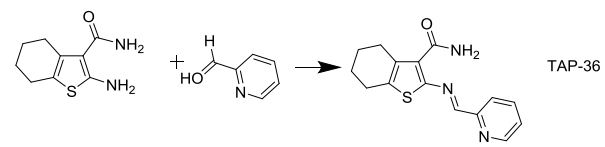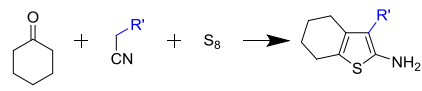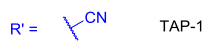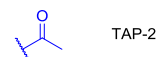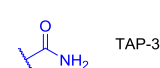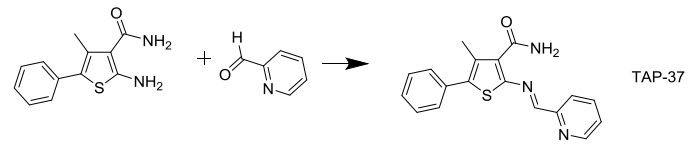

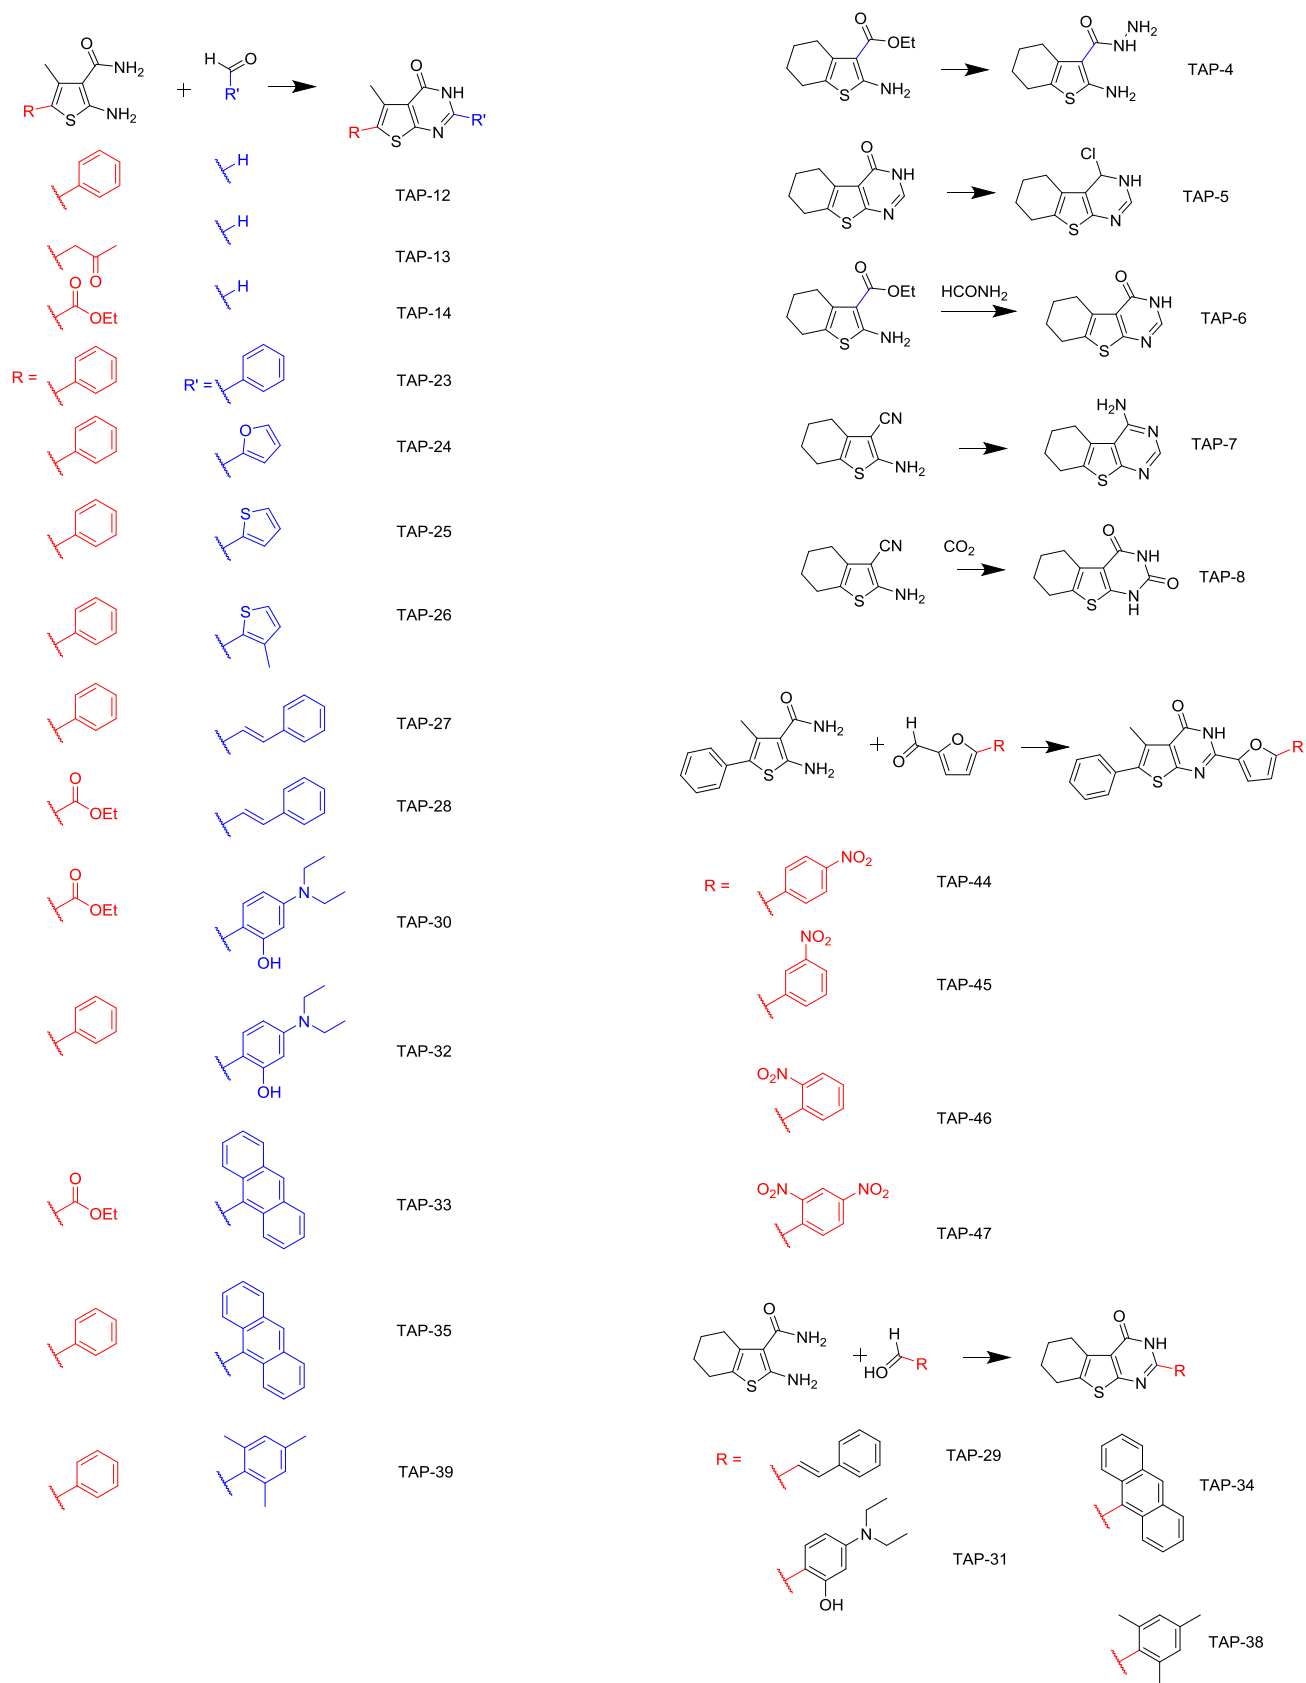

**Scheme S1:** Overall synthetic scheme for **TAP-1** to **55**

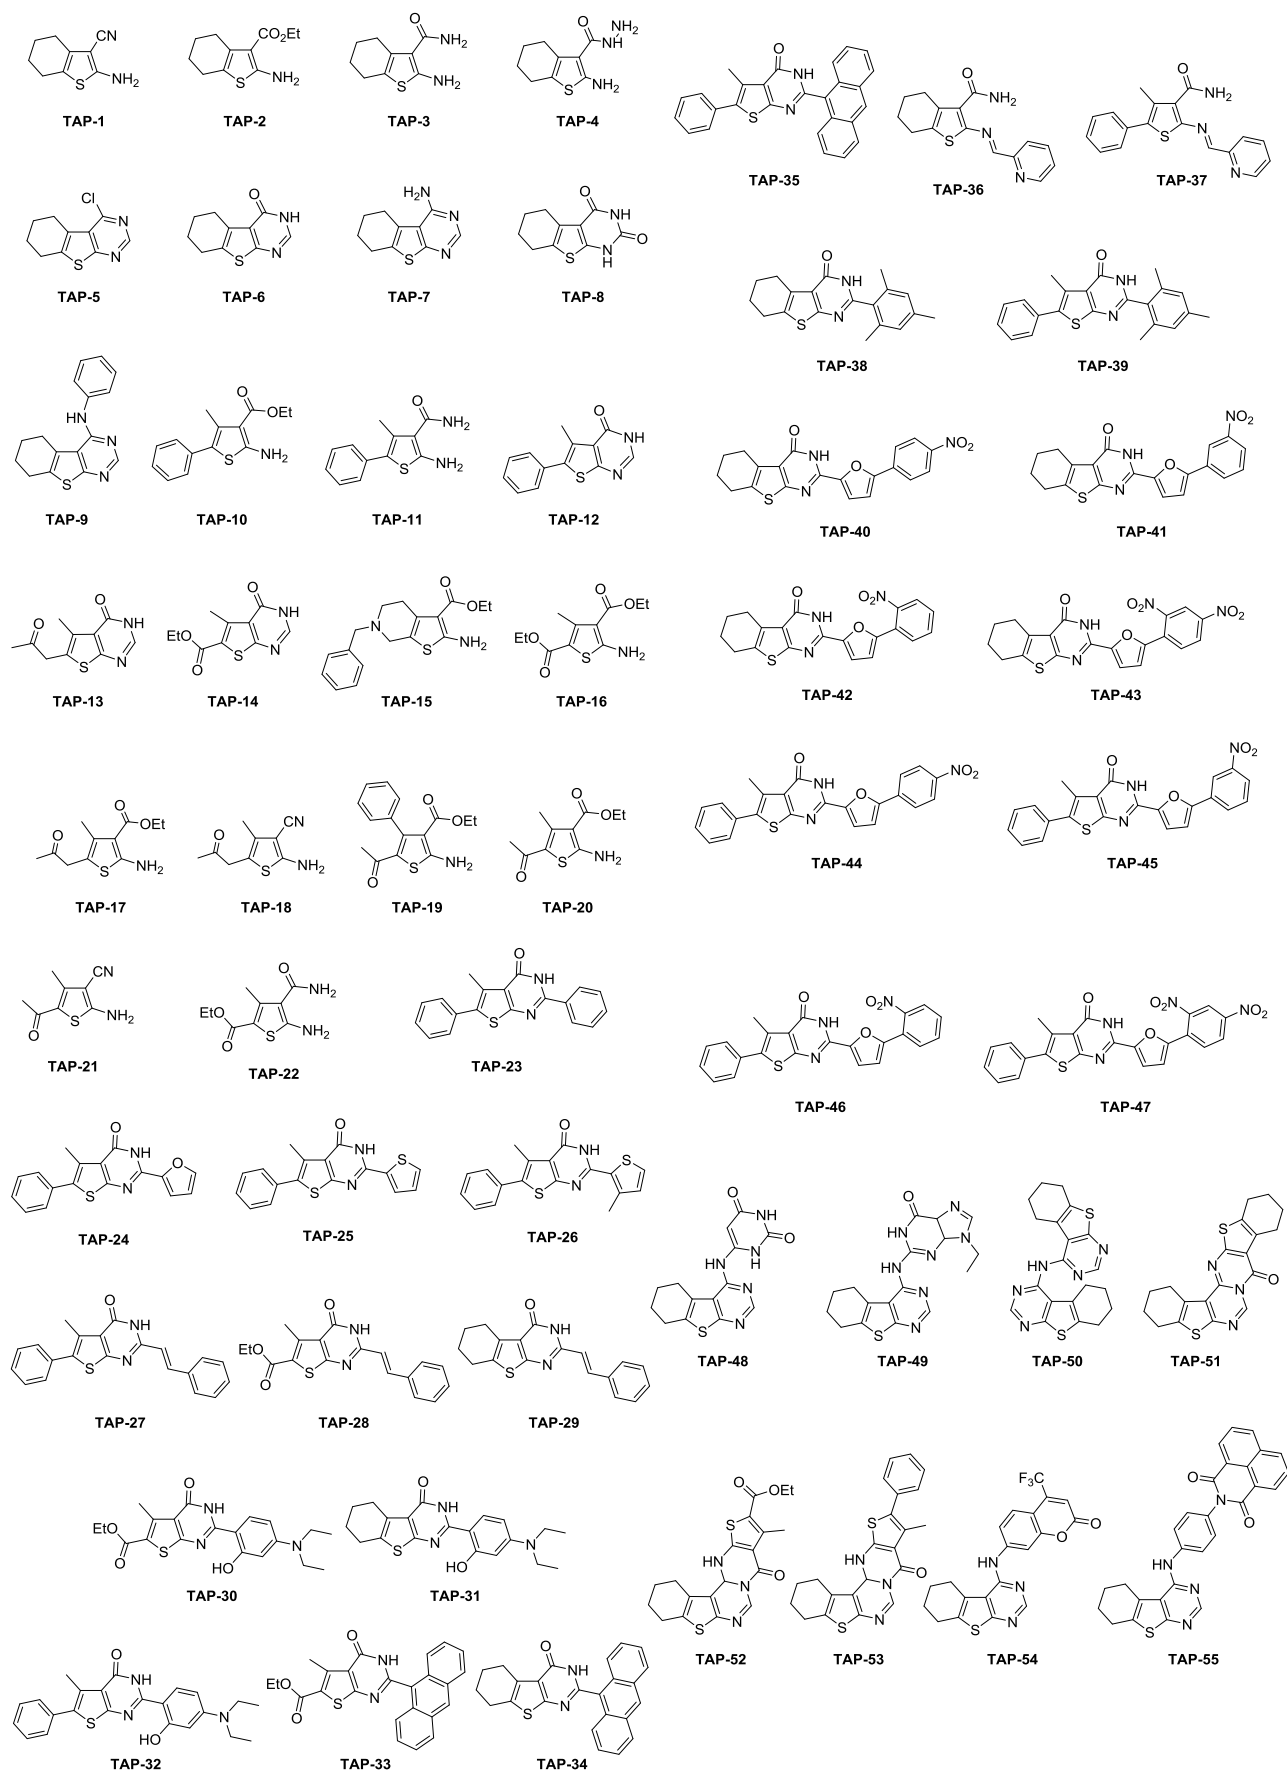

**Scheme S2:** The structures of **TAP-1** to **55**

**Table S3:** The optimum excitation and emission wavelength pair for each probe in the top twelve. These were used as the scanning points for the final twelve array.

| Probe         | $\lambda_{\text{ex}} / \lambda_{\text{em}}$ |
|---------------|---------------------------------------------|
| <b>TAP-6</b>  | 360 / 410                                   |
| <b>TAP-14</b> | 310 / 400                                   |
| <b>TAP-17</b> | 460 / 550                                   |
| <b>TAP-19</b> | 360 / 410                                   |
| <b>TAP-27</b> | 300 / 510                                   |
| <b>TAP-28</b> | 330 / 410                                   |
| <b>TAP-29</b> | 300 / 510                                   |
| <b>TAP-31</b> | 430 / 550                                   |
| <b>TAP-32</b> | 360 / 410                                   |
| <b>TAP-36</b> | 360 / 480                                   |
| <b>TAP-37</b> | 360 / 480                                   |
| <b>TAP-55</b> | 340 / 410                                   |

**Table S4:** Ranked responses of the probes to the metals tested. (A) an apparent change in excitation or emission wavelength, (B) a large change in emission intensity, (C) a small change in emission intensity and (D) no change. Each probe was awarded points based on the following scoring system, and then ranked in descending order. Each

(A) resulted in 3 points, (B) = 2, (C) = 1 and (D) = 0. Bonus points, to reward a varied response were awarded to probes which included at least one (A) + one (B) = 3 points, (A) + (C) = 2 points and (B) + (C) = 1 point. Final bonus points were awarded to probes which showed the greatest breadth of response to the range of metals. 3 points were awarded if a probe responded to more than seven metals, 2 points if more than five, and 1 point if more than 3.

|        | Al(III) | Cd(II) | Cu(I) | Cu(II) | Cr(VI) | Fe(II) | Hg(II) | Ni(II) | Zn(II) |
|--------|---------|--------|-------|--------|--------|--------|--------|--------|--------|
| TAP-32 | A       | B      | C     | C      | A      | D      | A      | D      | B      |
| TAP-28 | B       | C      | C     | B      | D      | A      | C      | B      | C      |
| TAP-36 | C       | A      | C     | B      | C      | C      | C      | C      | A      |
| TAP-27 | C       | B      | B     | D      | B      | C      | C      | B      | B      |
| TAP-6  | D       | A      | B     | D      | B      | D      | A      | B      | B      |
| TAP-31 | C       | D      | C     | C      | C      | B      | C      | D      | C      |
| TAP-14 | C       | D      | B     | C      | B      | C      | B      | C      | D      |
| TAP-29 | C       | B      | B     | D      | D      | C      | D      | C      | B      |
| TAP-19 | B       | A      |       | A      | D      | D      | D      | D      | D      |
| TAP-11 | C       | D      | D     | D      | C      | C      | B      | D      | B      |
| TAP-37 | D       | C      | C     | C      | D      | D      | B      | B      | C      |
| TAP-55 | D       | D      | C     | B      | D      | C      | A      | D      | D      |
| TAP-17 | D       | D      | B     | D      | D      | A      | B      | D      | D      |
| TAP-2  | C       | D      | D     | B      | B      | D      | D      | D      | D      |
| TAP-4  | D       | D      | B     | D      | D      | C      | B      | D      | D      |
| TAP-39 | D       | C      | B     | B      | B      | D      | D      | D      | D      |
| TAP-23 | D       | C      | C     | C      | D      | C      | D      | D      | C      |
| TAP-7  | B       | D      | C     | D      | D      | C      | C      | D      | D      |
| TAP-22 | B       | D      | D     | C      | D      | C      | C      | D      | D      |
| TAP-33 | D       | D      | B     | D      | D      | D      | D      | C      | D      |
| TAP-15 | B       | B      | D     | D      | D      | D      | B      | D      | D      |
| TAP-44 | A       | D      | D     | A      | D      | D      | D      | A      | D      |
| TAP-5  | B       | D      | D     | D      | D      | B      | C      | D      | D      |
| TAP-40 | C       | D      | B     | D      | D      | D      | B      | D      | D      |
| TAP-10 | D       | D      | D     | D      | D      | A      | D      | D      | D      |
| TAP-18 | D       | B      | D     | D      | D      | A      | D      | D      | D      |
| TAP-48 | A       | D      | B     | D      | D      | D      | D      | D      | D      |
| TAP-12 | D       | D      | B     | C      | D      | D      | D      | D      | D      |
| TAP-26 | D       | D      | A     | D      | D      | D      | A      | C      | D      |
| TAP-1  | B       | D      | D     | C      | D      | D      | D      | D      | D      |
| TAP-30 | B       | D      | D     | D      | D      | D      | D      | D      | C      |
| TAP-51 | C       | D      | D     | D      | D      | D      | B      | D      | D      |
| TAP-13 | C       | D      | D     | C      | D      | D      | C      | C      | D      |
| TAP-25 | D       | D      | D     | D      | D      | C      | D      | D      | C      |
| TAP-38 | D       | C      | D     | C      | C      | D      | D      | D      | C      |
| TAP-49 | D       | D      | D     | D      | D      | C      | D      | D      | A      |
| TAP-3  | C       | D      | D     | C      | D      | D      | D      | D      | D      |
| TAP-16 | D       | D      | D     | D      | D      | D      | C      | D      | C      |
| TAP-34 | D       | C      | D     | D      | D      | D      | D      | D      | C      |
| TAP-24 | D       | D      | D     | D      | B      | D      | D      | D      | D      |
| TAP-21 | D       | D      | D     | D      | D      | C      | D      | D      | D      |
| TAP-50 | D       | D      | D     | D      | D      | C      | D      | D      | D      |
| TAP-8  | D       | D      | D     | D      | D      | D      | D      | D      | D      |
| TAP-9  | D       | D      | D     | D      | D      | D      | D      | D      | D      |
| TAP-20 | D       | D      | D     | D      | D      | D      | D      | D      | D      |
| TAP-35 | D       | D      | D     | D      | D      | D      | D      | D      | D      |
| TAP-41 | D       | D      | D     | D      | D      | D      | D      | D      | D      |
| TAP-42 | D       | D      | D     | D      | D      | D      | D      | D      | D      |
| TAP-43 | D       | D      | D     | D      | D      | D      | D      | D      | D      |
| TAP-45 | D       | D      | D     | D      | D      | D      | D      | D      | D      |
| TAP-46 | D       | D      | D     | D      | D      | D      | D      | D      | D      |
| TAP-47 | D       | D      | D     | D      | D      | D      | D      | D      | D      |
| TAP-52 | D       | D      | D     | D      | D      | D      | D      | D      | D      |
| TAP-53 | D       | D      | D     | D      | D      | D      | D      | D      | D      |
| TAP-54 | D       | D      | D     | D      | D      | D      | D      | D      | D      |

**Table S5:** Raw fluorescence data for the array performed on the top twelve ranking probes. Each probe was scanned at the wavelengths shown in the previous SI figure. The value represented is the mean of three sets of 50 flashes. The five replicates are shown.



|        | TAP-6 | TAP-14 | TAP-17 | TAP-19 | TAP-27 | TAP-28 | TAP-29 | TAP-31 | TAP-32 | TAP-36 | TAP-37 | TAP-55 |
|--------|-------|--------|--------|--------|--------|--------|--------|--------|--------|--------|--------|--------|
| -      | 1,411 | 10,038 | 630    | 359    | 10,907 | 1,939  | 6,497  | 220    | 122    | 205    | 126    | 489    |
| -      | 1,414 | 10,196 | 597    | 336    | 11,060 | 1,928  | 6,331  | 233    | 109    | 190    | 132    | 457    |
| -      | 1,409 | 10,101 | 702    | 365    | 10,860 | 1,927  | 6,292  | 258    | 112    | 223    | 151    | 471    |
| -      | 1,267 | 10,277 | 711    | 356    | 10,943 | 1,981  | 6,238  | 255    | 140    | 184    | 137    | 476    |
| -      | 1,415 | 10,306 | 752    | -      | 11,232 | 2,000  | 6,790  | 226    | 144    | 218    | 161    | 488    |
| Al     | 1,211 | 6,296  | 313    | 281    | 12,328 | 1,162  | 5,530  | 244    | 77     | 143    | 92     | 396    |
| Al     | 1,247 | 7,957  | 352    | 293    | 12,350 | 1,183  | 5,930  | 264    | 110    | 138    | 101    | 415    |
| Al     | 1,176 | 8,166  | 316    | 263    | 12,279 | 1,207  | 6,149  | 241    | 70     | 145    | 96     | 365    |
| Al     | 1,167 | 8,330  | 329    | 308    | 12,294 | 2,091  | 5,964  | 272    | 113    | 162    | 124    | 436    |
| Al     | 1,138 | 8,460  | 329    | 253    | 12,940 | 1,210  | 6,676  | 283    | 66     | 178    | 109    | 399    |
| Cd     | 1,394 | 10,914 | 396    | 346    | 10,802 | 1,924  | 6,218  | 180    | 102    | 1,875  | 358    | 445    |
| Cd     | 1,412 | 10,658 | 413    | 348    | 10,797 | 1,894  | 6,137  | 176    | 117    | 1,830  | 321    | 467    |
| Cd     | 1,390 | 10,664 | 419    | 343    | 10,734 | 1,914  | 6,131  | 184    | 85     | 1,889  | 323    | 484    |
| Cd     | 1,391 | 11,005 | 404    | 358    | 10,537 | 1,964  | 6,361  | 187    | 112    | 1,886  | 348    | 461    |
| Cd     | 1,383 | 11,202 | 422    | 351    | 10,655 | 2,005  | 6,936  | 208    | 119    | 2,158  | 357    | 473    |
| Cu(I)  | 729   | 6,867  | 303    | 231    | 9,354  | 1,449  | 5,345  | 209    | 99     | 153    | 78     | 200    |
| Cu(I)  | 718   | 6,936  | 352    | 224    | 9,510  | 1,341  | 5,564  | 224    | 89     | 146    | 77     | 207    |
| Cu(I)  | 668   | 6,709  | 335    | 217    | 9,602  | 1,402  | 5,372  | 233    | 107    | 130    | 84     | 210    |
| Cu(I)  | 673   | 7,154  | 372    | 246    | 9,390  | 1,442  | 5,755  | 227    | 86     | 135    | 61     | 219    |
| Cu(I)  | 689   | 7,221  | 367    | 209    | 9,335  | 1,461  | 5,799  | 224    | 92     | 169    | 101    | 227    |
| Cu(II) | 1,340 | 9,431  | 499    | 305    | 9,929  | 1,745  | 5,738  | 61     | 124    | 86     | 56     | 413    |
| Cu(II) | 1,346 | 9,488  | 483    | 320    | 10,008 | 1,753  | 5,844  | 45     | 150    | 89     | 11     | 448    |
| Cu(II) | 1,344 | 9,454  | 508    | 330    | 10,520 | 1,746  | 6,332  | 83     | 160    | 80     | -      | 436    |
| Cu(II) | 1,297 | 9,574  | 479    | 306    | 10,687 | 1,731  | 6,189  | 63     | 131    | 96     | 23     | 427    |
| Cu(II) | 1,318 | 9,192  | 517    | 322    | 10,255 | 1,363  | 6,586  | 58     | 170    | 78     | 35     | 450    |
| Cr     | 1,236 | 8,601  | 567    | 299    | 9,343  | 1,519  | 6,044  | 44     | 133    | 92     | 3      | 404    |
| Cr     | 1,282 | 8,743  | 619    | 313    | 9,474  | 1,543  | 5,386  | 50     | 137    | 77     | 10     | 458    |
| Cr     | 1,259 | 8,635  | 690    | 323    | 9,704  | 1,580  | 5,492  | 34     | 128    | 76     | 52     | 463    |
| Cr     | 1,303 | 9,074  | 843    | 331    | 9,763  | 1,483  | 5,327  | 35     | 123    | 107    | 21     | 447    |
| Cr     | 1,282 | 8,961  | 778    | 313    | 9,652  | 1,516  | 6,238  | 49     | 117    | 85     | 33     | 454    |
| Fe     | 1,022 | 6,552  | 422    | 267    | 7,620  | 2,027  | 4,279  | 77     | 130    | 143    | 55     | 335    |
| Fe     | 1,013 | 6,387  | 426    | 250    | 7,666  | 2,042  | 4,126  | 42     | 85     | 155    | 80     | 337    |
| Fe     | 977   | 6,638  | 410    | 243    | 7,631  | 2,061  | 4,161  | 69     | 130    | 149    | 31     | 355    |
| Fe     | 961   | 6,801  | 455    | 250    | 7,716  | 2,389  | 4,122  | 88     | 103    | 134    | 63     | 345    |
| Fe     | 1,033 | 7,017  | 443    | 253    | 7,891  | 2,375  | 4,779  | 88     | 129    | 130    | 48     | 351    |
| Hg     | 609   | 1,686  | 488    | 343    | 7,889  | 123    | 4,916  | 94     | 122    | 109    | 39     | 312    |
| Hg     | 600   | 1,771  | 466    | 328    | 8,073  | 97     | 4,954  | 132    | 156    | 90     | 31     | 298    |
| Hg     | 587   | 1,805  | 502    | 328    | 7,969  | 92     | 4,985  | 145    | 144    | 90     | 27     | 338    |
| Hg     | 582   | 2,129  | 625    | 332    | 8,104  | 176    | 5,043  | 138    | 155    | 104    | 44     | 316    |
| Hg     | 591   | 2,222  | 501    | 364    | 7,899  | 145    | 5,652  | 127    | 151    | 103    | 5      | 337    |
| Ni     | 1,388 | 10,053 | 335    | 336    | 10,478 | 1,868  | 5,887  | 125    | 105    | 96     | 63     | 455    |
| Ni     | 1,409 | 9,975  | 345    | 316    | 10,524 | 1,944  | 6,135  | 164    | 79     | 115    | 17     | 437    |
| Ni     | 1,380 | 9,877  | 359    | 341    | 10,631 | 1,911  | 6,144  | 128    | 95     | 100    | 32     | 473    |
| Ni     | 1,397 | 10,332 | 322    | 338    | 10,646 | 1,894  | 6,224  | 141    | 109    | 113    | 60     | 467    |
| Ni     | 1,376 | 10,068 | 359    | 327    | 10,652 | 1,949  | 6,714  | 140    | 105    | 79     | 25     | 530    |
| Zn     | 1,436 | 10,460 | 479    | 336    | 10,803 | 1,914  | 5,943  | 260    | 135    | 3,082  | 1,016  | 453    |
| Zn     | 1,422 | 10,496 | 527    | 361    | 10,369 | 1,923  | 6,441  | 225    | 152    | 3,197  | 1,002  | 462    |
| Zn     | 1,403 | 10,330 | 482    | 360    | 11,007 | 1,345  | 6,104  | 234    | 158    | 3,205  | 1,024  | 432    |
| Zn     | 1,391 | 10,542 | 514    | 347    | 10,853 | 1,752  | 6,530  | 245    | 152    | 3,373  | 1,077  | 451    |
| Zn     | 1,396 | 10,584 | 522    | 328    | 10,923 | 2,001  | 6,648  | 245    | 141    | 3,786  | 1,037  | 468    |

**Table S6:** Raw fluorescence data for the array performed using the final four probes in lake water. Each probe was scanned at each of the optimum wavelengths for each of the probes as shown in the header. The values represented are the mean of three sets of 50 flashes. The four replicates are shown.

|         | TAP-6 ( $\lambda_{ex} / \lambda_{em}$ ) |           |           |           | TAP-14 ( $\lambda_{ex} / \lambda_{em}$ ) |           |           |           | TAP-27 ( $\lambda_{ex} / \lambda_{em}$ ) |           |           |           | TAP-36 ( $\lambda_{ex} / \lambda_{em}$ ) |           |           |           |
|---------|-----------------------------------------|-----------|-----------|-----------|------------------------------------------|-----------|-----------|-----------|------------------------------------------|-----------|-----------|-----------|------------------------------------------|-----------|-----------|-----------|
|         | 300 / 510                               | 310 / 400 | 360 / 410 | 360 / 480 | 300 / 510                                | 310 / 400 | 360 / 410 | 360 / 480 | 300 / 510                                | 310 / 400 | 360 / 410 | 360 / 480 | 300 / 510                                | 310 / 400 | 360 / 410 | 360 / 480 |
| Blank   | 1,453                                   | 3,030     | 3,045     | 1,416     | 927                                      | 77,219    | 3,880     | 670       | 11,931                                   | 765       | 381       | 4,933     | 739                                      | 846       | 540       | 697       |
| Blank   | 1,514                                   | 3,097     | 3,175     | 1,503     | 1,053                                    | 84,643    | 4,217     | 769       | 12,422                                   | 808       | 414       | 5,177     | 832                                      | 896       | 623       | 868       |
| Blank   | 1,483                                   | 3,029     | 3,027     | 1,435     | 1,175                                    | 92,070    | 4,008     | 734       | 12,552                                   | 814       | 433       | 5,194     | 859                                      | 1,006     | 652       | 908       |
| Blank   | 1,525                                   | 3,175     | 3,187     | 1,493     | 1,126                                    | 92,498    | 3,932     | 750       | 12,347                                   | 839       | 440       | 5,110     | 840                                      | 984       | 684       | 926       |
| Al(III) | 1,339                                   | 2,828     | 2,914     | 1,434     | 428                                      | 3,087     | 644       | 560       | 11,263                                   | 688       | 432       | 5,497     | 787                                      | 1,097     | 933       | 1,079     |
| Al(III) | 1,516                                   | 3,248     | 3,485     | 1,721     | 444                                      | 3,323     | 720       | 592       | 11,836                                   | 746       | 481       | 5,389     | 786                                      | 1,036     | 862       | 1,032     |
| Al(III) | 1,665                                   | 3,677     | 3,965     | 1,920     | 436                                      | 3,040     | 666       | 591       | 12,307                                   | 719       | 430       | 5,705     | 839                                      | 1,075     | 944       | 1,095     |
| Al(III) | 1,490                                   | 3,280     | 3,472     | 1,666     | 445                                      | 3,194     | 1,067     | 841       | 12,195                                   | 743       | 477       | 5,915     | 805                                      | 1,074     | 951       | 1,093     |
| Cd(II)  | 1,389                                   | 2,871     | 2,933     | 1,370     | 1,023                                    | 100,089   | 2,920     | 611       | 11,123                                   | 720       | 390       | 4,798     | 3,539                                    | 922       | 1,787     | 12,730    |
| Cd(II)  | 1,378                                   | 2,997     | 3,054     | 1,465     | 1,106                                    | 110,537   | 3,090     | 636       | 11,252                                   | 751       | 417       | 4,935     | 3,545                                    | 929       | 1,767     | 12,921    |
| Cd(II)  | 1,277                                   | 2,793     | 2,808     | 1,361     | 1,113                                    | 110,096   | 2,685     | 629       | 10,691                                   | 769       | 391       | 4,836     | 4,176                                    | 1,158     | 2,362     | 16,565    |
| Cd(II)  | 1,339                                   | 2,797     | 2,857     | 1,382     | 1,046                                    | 108,512   | 2,639     | 639       | 11,256                                   | 769       | 413       | 5,183     | 4,174                                    | 1,164     | 2,418     | 16,693    |
| Cu(I)   | 829                                     | 1,958     | 3,150     | 1,348     | 187                                      | 2,993     | 243       | 153       | 7,645                                    | 301       | 195       | 3,900     | 157                                      | 471       | 234       | 148       |
| Cu(I)   | 893                                     | 2,264     | 3,551     | 1,517     | 162                                      | 2,926     | 286       | 146       | 5,953                                    | 297       | 224       | 3,128     | 162                                      | 480       | 253       | 139       |
| Cu(I)   | 912                                     | 2,342     | 4,615     | 2,185     | 189                                      | 3,024     | 257       | 143       | 5,690                                    | 283       | 272       | 4,668     | 180                                      | 577       | 304       | 186       |
| Cu(I)   | 774                                     | 1,978     | 3,843     | 1,767     | 179                                      | 3,260     | 252       | 153       | 5,225                                    | 346       | 291       | 4,415     | 175                                      | 573       | 317       | 180       |
| Cu(II)  | 472                                     | 1,474     | 2,306     | 1,028     | 101                                      | 4,764     | 348       | 155       | 6,453                                    | 182       | 211       | 4,758     | 59                                       | 352       | 215       | 119       |
| Cu(II)  | 557                                     | 1,655     | 2,728     | 1,132     | 111                                      | 4,970     | 372       | 149       | 6,082                                    | 202       | 186       | 4,268     | 108                                      | 372       | 264       | 162       |
| Cu(II)  | 552                                     | 1,590     | 2,468     | 1,022     | 134                                      | 4,939     | 346       | 180       | 5,330                                    | 251       | 267       | 4,141     | 153                                      | 568       | 272       | 167       |
| Cu(II)  | 526                                     | 1,564     | 2,436     | 1,029     | 123                                      | 5,277     | 369       | 186       | 5,155                                    | 264       | 244       | 3,634     | 130                                      | 561       | 283       | 170       |
| Cr(VI)  | 398                                     | 522       | 244       | 171       | 195                                      | 1,938     | 72        | 60        | 3,559                                    | 170       | 47        | 578       | 273                                      | 149       | 89        | 125       |
| Cr(VI)  | 480                                     | 626       | 323       | 190       | 212                                      | 2,119     | 65        | 64        | 3,926                                    | 133       | 51        | 676       | 285                                      | 183       | 65        | 121       |
| Cr(VI)  | 429                                     | 533       | 261       | 161       | 221                                      | 1,775     | 89        | 104       | 3,685                                    | 154       | 73        | 520       | 276                                      | 189       | 88        | 134       |
| Cr(VI)  | 494                                     | 640       | 298       | 178       | 195                                      | 2,015     | 84        | 100       | 3,923                                    | 146       | 92        | 583       | 297                                      | 208       | 107       | 148       |
| Fe(II)  | 902                                     | 1,921     | 2,124     | 1,008     | 517                                      | 1,602     | 361       | 290       | 8,350                                    | 426       | 249       | 3,333     | 173                                      | 541       | 257       | 148       |
| Fe(II)  | 953                                     | 2,014     | 2,307     | 1,056     | 575                                      | 1,670     | 371       | 307       | 8,443                                    | 399       | 241       | 3,408     | 196                                      | 499       | 213       | 160       |
| Fe(II)  | 872                                     | 1,857     | 2,071     | 985       | 522                                      | 1,521     | 356       | 295       | 7,132                                    | 404       | 274       | 3,014     | 177                                      | 451       | 239       | 148       |
| Fe(II)  | 961                                     | 2,075     | 2,270     | 1,041     | 559                                      | 1,562     | 381       | 311       | 7,212                                    | 363       | 256       | 3,069     | 176                                      | 432       | 200       | 160       |
| Hg(II)  | 457                                     | 759       | 786       | 449       | 167                                      | 3,300     | 235       | 189       | 3,893                                    | 235       | 152       | 1,424     | 192                                      | 248       | 144       | 184       |
| Hg(II)  | 460                                     | 806       | 792       | 465       | 158                                      | 3,331     | 253       | 190       | 3,822                                    | 248       | 167       | 1,439     | 213                                      | 291       | 143       | 191       |
| Hg(II)  | 459                                     | 760       | 811       | 533       | 199                                      | 3,265     | 289       | 227       | 2,991                                    | 307       | 215       | 1,337     | 211                                      | 312       | 224       | 217       |
| Hg(II)  | 436                                     | 727       | 768       | 503       | 199                                      | 3,539     | 285       | 222       | 3,054                                    | 308       | 212       | 1,296     | 252                                      | 375       | 194       | 251       |
| Ni(II)  | 1,046                                   | 2,497     | 2,565     | 1,146     | 650                                      | 64,752    | 3,011     | 379       | 10,845                                   | 434       | 262       | 4,422     | 407                                      | 435       | 521       | 900       |
| Ni(II)  | 1,089                                   | 2,534     | 2,711     | 1,191     | 701                                      | 70,767    | 3,124     | 411       | 10,829                                   | 463       | 241       | 4,587     | 334                                      | 445       | 208       | 223       |
| Ni(II)  | 1,180                                   | 2,730     | 2,949     | 1,328     | 706                                      | 74,828    | 2,987     | 408       | 10,690                                   | 480       | 280       | 4,529     | 349                                      | 493       | 238       | 254       |
| Ni(II)  | 1,102                                   | 2,579     | 2,733     | 1,237     | 780                                      | 79,602    | 3,108     | 423       | 11,157                                   | 472       | 282       | 4,758     | 348                                      | 476       | 259       | 274       |
| Zn(II)  | 1,296                                   | 2,687     | 2,723     | 1,287     | 855                                      | 49,158    | 2,027     | 600       | 10,714                                   | 651       | 403       | 4,732     | 4,572                                    | 1,184     | 2,847     | 18,814    |
| Zn(II)  | 1,358                                   | 2,854     | 2,924     | 1,401     | 982                                      | 51,707    | 1,992     | 593       | 11,225                                   | 693       | 467       | 4,931     | 4,403                                    | 1,187     | 2,773     | 18,237    |
| Zn(II)  | 1,223                                   | 2,659     | 2,751     | 1,309     | 1,033                                    | 56,137    | 1,886     | 592       | 10,531                                   | 677       | 398       | 4,735     | 4,999                                    | 1,229     | 3,197     | 21,723    |
| Zn(II)  | 1,308                                   | 2,850     | 2,914     | 1,330     | 1,070                                    | 57,019    | 1,902     | 597       | 10,861                                   | 678       | 410       | 4,948     | 4,884                                    | 1,211     | 3,122     | 21,401    |
